# Supplementary material for: Enhanced photovoltaic performances of graphene/Si solar cells by insertion of a MoS2thin film
Source: Royal Society of Chemistry journal article supplement (doi:10.1039/c5nr03046c), 2015-01-01
Supplement: c5nr03046c1.pdf [file c5nr03046c1.pdf]

## Supporting Information

### Enhanced Photovoltaic Performances of Graphene/Si Solar Cells by Insertion of MoS<sub>2</sub> Thin Film

Yuka Tsuboi<sup>†</sup>, Feijiu Wang<sup>†</sup>, Daichi Kozawa<sup>†</sup>, Kazuma Funahashi<sup>‡</sup>,  
Shinichiro Mouri<sup>†</sup>, Yuhei Miyauchi<sup>†</sup>, Taishi Takenobu<sup>‡</sup> and Kazunari Matsuda<sup>†\*</sup>

<sup>†</sup>*Institute of Advanced Energy, Kyoto University, Gokasho, Uji, Kyoto 611-0011, Japan*

<sup>‡</sup>*Department of Advanced Science and Engineering, Waseda University, Shinjuku-ku,  
Tokyo 169-8555, Japan*

\*Email: matsuda@iae.kyoto-u.ac.jp

## S1. MoS<sub>2</sub> film fabrication

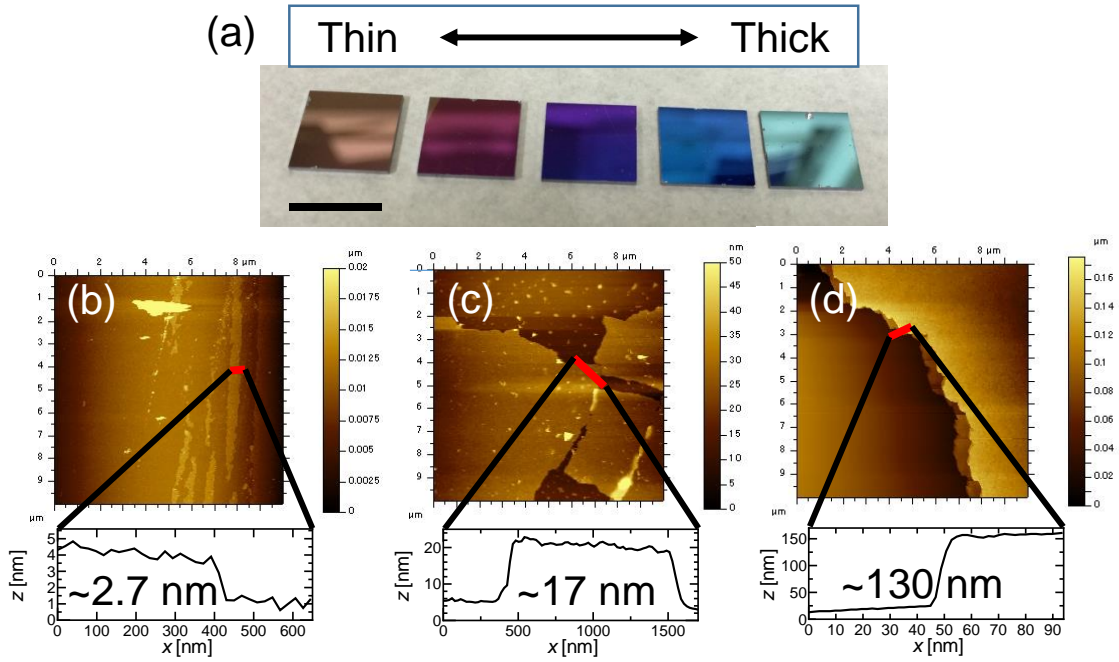

**Figure S1.** (a) Optical image of as-grown MoS<sub>2</sub> films with various layer thicknesses on SiO<sub>2</sub>/Si substrates, as fabricated by the CVD method. The scale bar is 1 cm. The thickness of the MoS<sub>2</sub> films was controlled *via* the MoO<sub>3</sub> deposition time. We observed that MoS<sub>2</sub> film with a thickness of  $\sim 2/3$  of the original MoO<sub>3</sub> film is fabricated by CVD process in the case of MoO<sub>3</sub> with an averaged thickness of 30 nm. The leftmost image is an SiO<sub>2</sub>/Si substrate. (b)–(d) AFM image of an MoS<sub>2</sub> film. The height profiles are measured at the step edge between the MoS<sub>2</sub> film and the SiO<sub>2</sub>/Si substrate. The thickness of the MoS<sub>2</sub> films was varied from 2.7 to 130 nm. For solar cells in Figure 3, we used films with  $\sim 17$ -nm thickness, as shown in (c).

## S2. Process-flow of MoS<sub>2</sub> film transfer

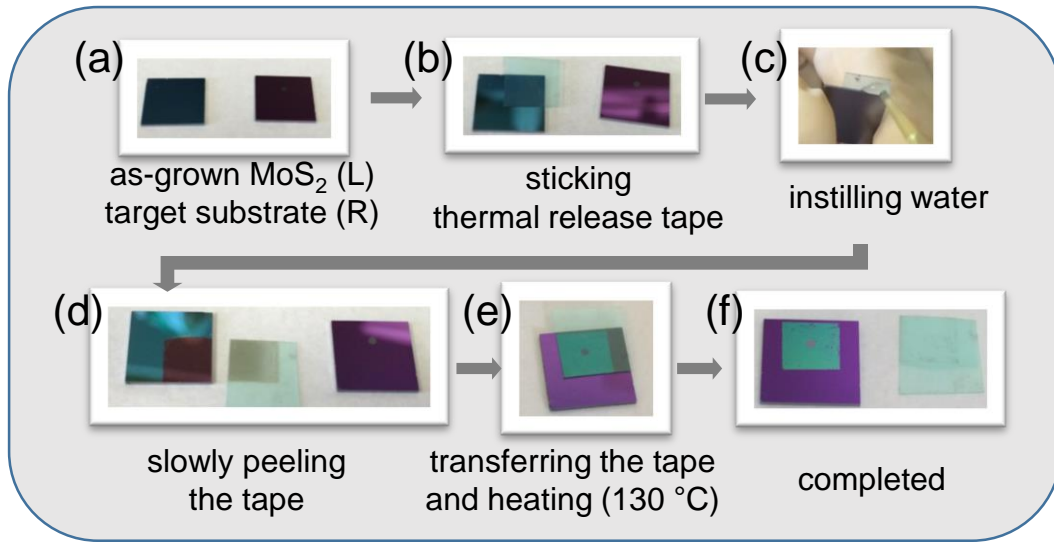

**Figure S2.** (a)–(f) The process-flow of as-grown MoS<sub>2</sub> film transfer. This method was conducted using thermal release tape (REVALPHA; No. 3195MS, Nitto Denko). The sticking MoS<sub>2</sub> film with the thermal release tape (left in (b)) was easily released by a drop of water, as shown in (c). After the tape with MoS<sub>2</sub> was transferred to the target substrate, the tape was removed by heating the substrate on a hotplate.

### S3. Characterization of stacked graphene/MoS<sub>2</sub> film

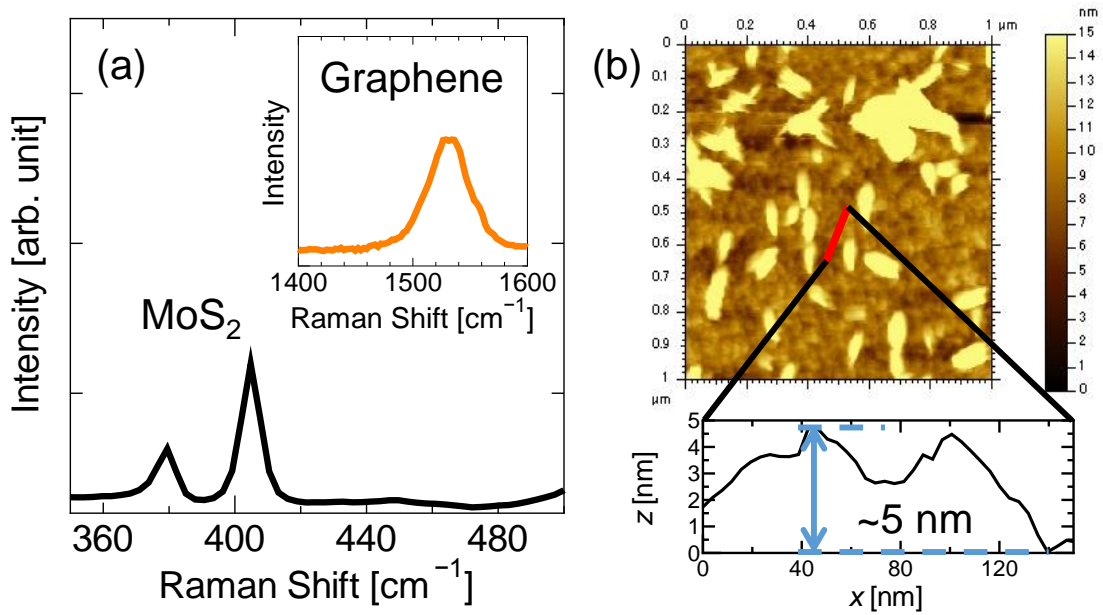

**Figure S3.** (a) Raman spectrum of the vertical stacking of graphene/MoS<sub>2</sub>. (b) AFM image of a stacked graphene/MoS<sub>2</sub> film and its height profile along the red line in the image. The surface roughness of the graphene/MoS<sub>2</sub> film decreases in comparison with that of the MoS<sub>2</sub> film (Figure 2(a)).

#### S4. Photovoltaic parameters of graphene/MoS<sub>2</sub>/*n*-Si solar cells

| Cell Type                           | $V_{OC}$<br>[V] | $J_{SC}$<br>[mA/cm <sup>2</sup> ] | FF   | $\eta$<br>[%] | $R_s$<br>[ $\Omega \cdot \text{cm}^2$ ] |
|-------------------------------------|-----------------|-----------------------------------|------|---------------|-----------------------------------------|
| MLG/ <i>n</i> -Si                   | 0.38            | 6.76                              | 0.17 | 0.44          | 17                                      |
| MLG/MoS <sub>2</sub> / <i>n</i> -Si | 0.41            | 13.1                              | 0.25 | 1.35          | 30                                      |
| BLG/MoS <sub>2</sub> / <i>n</i> -Si | 0.51            | 21.4                              | 0.55 | 5.98          | 11                                      |
| TLG/MoS <sub>2</sub> / <i>n</i> -Si | 0.54            | 28.2                              | 0.53 | 8.02          | 8.8                                     |

**Table S1.** Photovoltaic parameters of monolayer-graphene/*n*-Si and graphene/MoS<sub>2</sub>/*n*-Si solar cells with monolayer-graphene (MLG), bilayer-graphene (BLG) and trilayer-graphene (TLG), as evaluated from experimentally obtained  $J$ - $V$  curves. The open-circuit voltage  $V_{OC}$ , short-circuit current density  $J_{SC}$ , fill factor FF, photovoltaic efficiency  $\eta$ , and series resistance  $R_s$  are shown. Here, the  $R_s$  values were estimated from the slopes of the  $J$ - $V$  curves.<sup>S1</sup>

## S5. Transmission spectra and sheet resistance of graphene

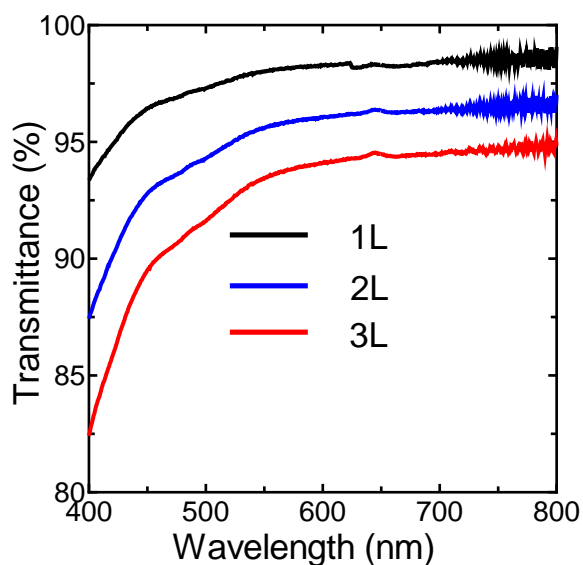

**Figure S4.** Transmission spectra of graphene films used in this study as a function of layer numbers.

Optical transmission spectra of graphene films used in this study are shown in Fig. S4. Sheet resistances of each sample were also measured by four-probe method. The sheet resistances drastically decreased from 41 k $\Omega$ /sq. in monolayer (1L), 4.9 k $\Omega$ /sq. in bilayers (2L), to 1.5 k $\Omega$ /sq. in trilayers (3L).

**S5. The incident photon-to-current conversion efficiency (IPCE) spectrum of graphene/MoS<sub>2</sub>/n-Si solar cells**

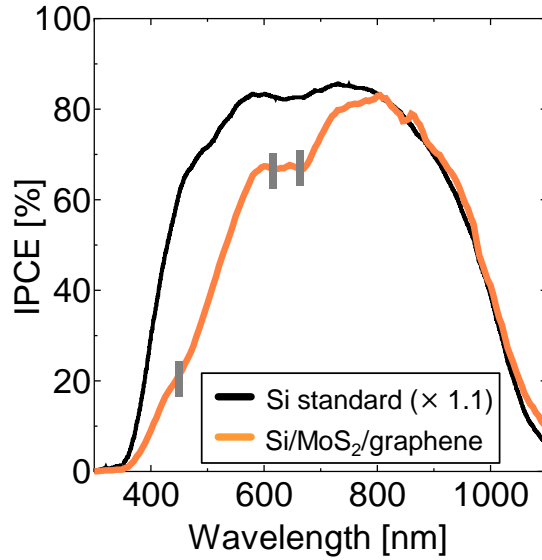

**Figure S5.** IPCE spectra of a trilayer-graphene/MoS<sub>2</sub>/n-Si solar cell and a standard Si solar cell. The spectrum of the standard Si solar cell is normalized by the values at 800 nm. The dip structures were observed in the IPCE spectrum of graphene/MoS<sub>2</sub>/n-Si in the shorter-wavelength region (400–700 nm). The positions of these dip structures are consistent with the absorption peaks of the MoS<sub>2</sub> film shown in Figure 2(b), which suggests that the generated carriers in the n-Si layer are the primary contributors to the photovoltaic current in the cell, whereas the MoS<sub>2</sub> functions as a shading layer at the point of light absorption.

## S6. Carrier transport properties of an MoS<sub>2</sub> film, as measured by an electric double-layer transistor

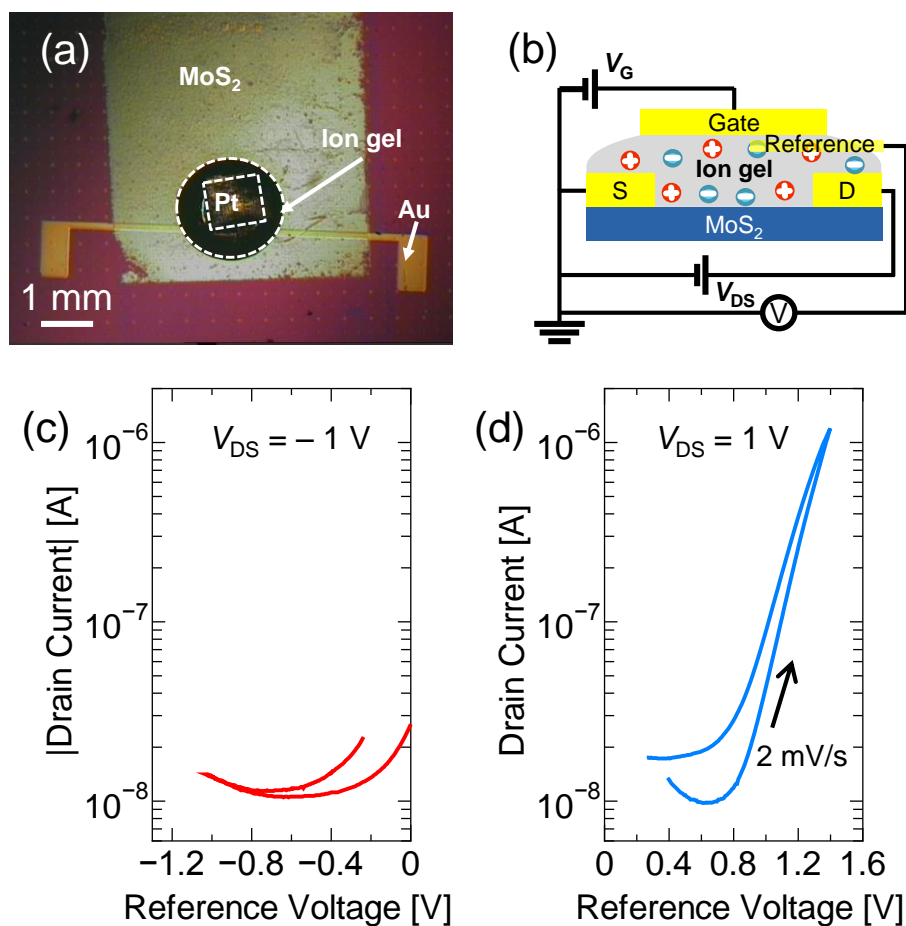

**Figure S6.** (a) Optical image of CVD-grown MoS<sub>2</sub> electric double-layer transistor and (b) A schematic illustration of the transistor, in which an ionic gel ([EMIM][TFSI] with PS-PMMA-PS) as a gate electrolyte, Pt as a top-gate electrode, and Ni/Au source and drain electrodes were used.<sup>S2</sup> (c)(d) Transfer characteristics measured by changing the voltage of the Pt top-gate electrodes. Current resulting from electron transfer was confirmed (blue line), whereas current resulting from hole transfer was not (red line).



## Reference

- S1. Miao, X.; Tongay, S.; Petterson, M. K.; Berke, K.; Rinzler, A. G.; Appleton, B. R.; Hebard, A. F., High Efficiency Graphene Solar Cells by Chemical Doping. *Nano Lett.* **2012**, 12, 2745-2750.
- S2. Pu, J.; Yomogida, Y.; Liu, K.-K.; Li, L.-J.; Iwasa, Y.; Takenobu, T., Highly Flexible MoS<sub>2</sub> Thin-Film Transistors with Ion Gel Dielectrics. *Nano Lett.* **2012**, 12, 4013-4017.
